# Supplementary material for: Porous nitrogen-doped carbon microspheres as anode materials for lithium ion batteries
Source: Royal Society of Chemistry journal article supplement (doi:10.1039/c4dt01223b), 2014-06-05
Supplement: c4dt01223b1.pdf [file c4dt01223b1.pdf]

## Porous nitrogen-doped carbon microspheres as anode materials for lithium ion batteries

Taiqiang Chen<sup>a</sup>, Likun Pan<sup>\*a</sup>, T.A.J. Loh<sup>b</sup>, D.H.C. Chua<sup>b</sup>, Yefeng Yao<sup>a</sup>, Qun Chen<sup>a</sup>,  
Dongsheng Li<sup>a</sup>, Wei Qin<sup>a</sup> and Zhuo Sun<sup>a</sup>

<sup>a</sup> *Engineering Research Center for Nanophotonics & Advanced Instrument, Ministry of Education, Shanghai Key Laboratory of Magnetic Resonance, Department of Physics, East China Normal University, Shanghai 200062, China, Fax: +86 21 62234321; Tel: +86 21 62234132; E-mail: lkpan@phy.ecnu.edu.cn*

<sup>b</sup> *Department of Materials Science and Engineering, National University of Singapore 117574, Singapore*

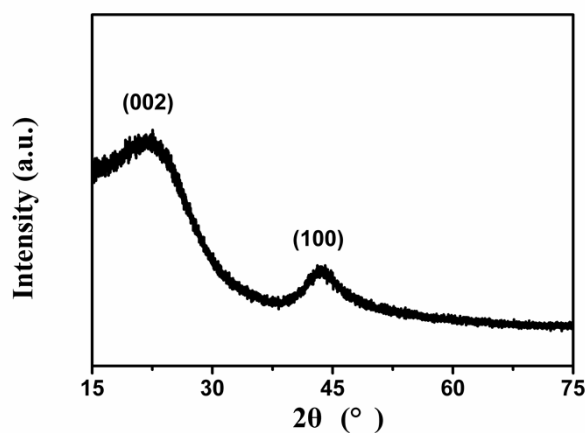

**Figure S1** XRD pattern of carbon spheres thermally treated at 900 °C for 2 h in a nitrogen atmosphere.

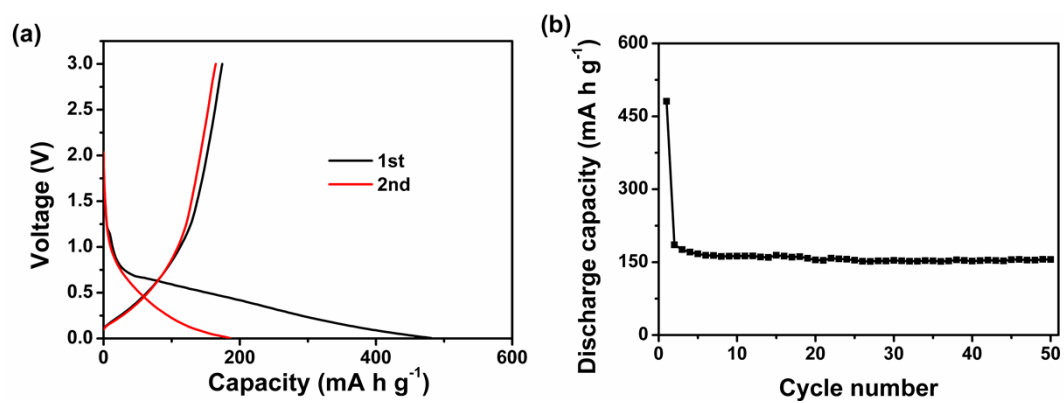

**Figure S2** (a) The first and second charge/discharge curves and (b) cycle performance of carbon spheres thermally treated at 900 °C for 2 h in a nitrogen atmosphere at a current density of 50  $\text{mA g}^{-1}$ .
